# Supplementary material
Source: MDPI journal article supplement (https://www.mdpi.com/2073-4441/13/9/1210)
Supplement: s1 [file s1]

## Supplementary Material

**Table S1.** Water quality parameters (pollutants), units, methods, instrumentation, and detection limits.

| Parameter    | Units | Method                                                                      | Instrument                    | Detection Limit   |
|--------------|-------|-----------------------------------------------------------------------------|-------------------------------|-------------------|
| TSS          | mg/L  | US EPA gravimetric method                                                   | Desiccator, furnace           | NA                |
| Phosphorus   | mg/L  | PhosVer 3® ascorbic acid method (SM4500-P)                                  | HACH® DR 2800                 | 0.02 to 2.5       |
| Nitrogen     | mg/L  | NitraVer® 5 cadmium reduction method (SM4500-NO <sub>3</sub> <sup>-</sup> ) | HACH® DR 2800                 | 0.3 to 30.0       |
| Heavy metals | µg/L  | Acid digestion/preparation                                                  | PerkinElmer NexION 350 ICP-MS | 0.0005 and 0.001* |

\* Detection limit of 0.0005 µg/L for lead (Pb) and copper (Cu), 0.001 µg/L for zinc (Zn). The persulfate digestion method (SM4500P, SM4500N) coupled with HACH colorimetric methods were used to determine TN and TP.

**Table S2.** Mean influent and effluent concentration  $\pm$  standard deviation of measured water quality parameters – Phase I.

| Water Quality Parameter   | Mean Concentration $\pm$ Standard Deviation |                 |                 |                 |                 |                 |                 |                 |
|---------------------------|---------------------------------------------|-----------------|-----------------|-----------------|-----------------|-----------------|-----------------|-----------------|
|                           | Sand                                        |                 | Man.Sand        |                 | Biofilter532    |                 | R.G.+Biofilter  |                 |
|                           | Influent                                    | Effluent        | Influent        | Effluent        | Influent        | Effluent        | Influent        | Effluent        |
| TSS (mg/L)                | 85.5 $\pm$ 8.99                             | 7.35 $\pm$ 17.3 | 78.8 $\pm$ 40.5 | 7.35 $\pm$ 13.7 | 69.0 $\pm$ 42.3 | 13.4 $\pm$ 9.33 | 206 $\pm$ 88.7  | 12.9 $\pm$ 16.4 |
| Orthophosphate (mg/L P)   | 0.16 $\pm$ 0.03                             | 0.08 $\pm$ 0.03 | 0.23 $\pm$ 0.02 | 0.02 $\pm$ 0.02 | --              | --              | 0.76 $\pm$ 0.20 | 0.93 $\pm$ 0.37 |
| Total Phosphorus (mg/L P) | 0.72 $\pm$ 0.06                             | 0.48 $\pm$ 0.11 | 0.93 $\pm$ 0.16 | 0.28 $\pm$ 0.06 | 1.14 $\pm$ 0.06 | 2.06 $\pm$ 0.60 | 2.58 $\pm$ 0.64 | 4.38 $\pm$ 0.74 |
| Nitrate (mg/L N)          | 0.87 $\pm$ 0.05                             | 1.81 $\pm$ 1.04 | 0.80 $\pm$ 0.18 | 1.08 $\pm$ 0.52 | --              | --              | --              | --              |
| Total Nitrogen (mg/L N)   | 1.16 $\pm$ 0.16                             | 1.24 $\pm$ 0.34 | 1.69 $\pm$ 0.16 | 2.25 $\pm$ 1.14 | 1.86 $\pm$ 0.75 | 1.51 $\pm$ 4.06 | 2.98 $\pm$ 0.21 | 3.64 $\pm$ 1.62 |
| Dissolved Lead (µg/L)     | 1.69 $\pm$ 0.38                             | 0.02 $\pm$ 0.08 | 26.6 $\pm$ 13.4 | 0.07 $\pm$ 0.06 | 15.3 $\pm$ 6.2  | 0*              | 4.35 $\pm$ 1.1  | 0.98 $\pm$ 0.67 |
| Total Lead (µg/L)         | 117 $\pm$ 14.6                              | 1.09 $\pm$ 0.45 | 94.5 $\pm$ 75.2 | 0.17 $\pm$ 0.14 | 51.6 $\pm$ 24.6 | 0.35 $\pm$ 0.18 | 102 $\pm$ 94.0  | 3.58 $\pm$ 2.99 |
| Dissolved Copper (µg/L)   | 9.24 $\pm$ 2.45                             | 7.36 $\pm$ 3.88 | 16.4 $\pm$ 11.5 | 0.57 $\pm$ 0.69 | 7.49 $\pm$ 1.88 | 42.0 $\pm$ 7.87 | 11.3 $\pm$ 1.15 | 20.0 $\pm$ 17.0 |
| Total Copper (µg/L)       | 36.7 $\pm$ 2.00                             | 11.2 $\pm$ 5.12 | 24.6 $\pm$ 14.3 | 1.54 $\pm$ 0.81 | 26.3 $\pm$ 8.76 | 55.1 $\pm$ 9.00 | 65.6 $\pm$ 42.3 | 46.5 $\pm$ 11.9 |
| Dissolved Zinc (µg/L)     | 65.1 $\pm$ 6.67                             | 4.44 $\pm$ 2.13 | 39.6 $\pm$ 2.7  | 1.61 $\pm$ 1.67 | 22.8 $\pm$ 12.5 | 8.00 $\pm$ 5.52 | 114 $\pm$ 27.1  | 11.2 $\pm$ 6.5  |
| Total Zinc (µg/L)         | 147 $\pm$ 5.68                              | 16.2 $\pm$ 8.02 | 48.2 $\pm$ 16.2 | 5.83 $\pm$ 0.68 | 90.0 $\pm$ 56.4 | 12.9 $\pm$ 13.2 | 138 $\pm$ 102   | 15.9 $\pm$ 13.2 |

\* Under detection limit considered as zero. -- Missing values are due to color interference.

**Table S3.** Mean influent and effluent concentration  $\pm$  standard deviation of measured water quality parameters- Phase II.

| Water Quality Parameter       | Mean Concentration $\pm$ Standard Deviation |                 |                 |                 |                 |                 |                 |                 |                 |                 |
|-------------------------------|---------------------------------------------|-----------------|-----------------|-----------------|-----------------|-----------------|-----------------|-----------------|-----------------|-----------------|
|                               | Lime-Mix                                    |                 | Blend#1         |                 | Blend#2         |                 | Biofilter433MS  |                 | Biofilter433    |                 |
|                               | Influent                                    | Effluent        | Influent        | Effluent        | Influent        | Effluent        | Influent        | Effluent        | Influent        | Effluent        |
| TSS (mg/L)                    | 15.9 $\pm$ 15.4                             | 4.46 $\pm$ 6.43 | 31.0 $\pm$ 5.87 | 11.1 $\pm$ 6.34 | 102 $\pm$ 74.9  | 12.2 $\pm$ 11.9 | 85.8 $\pm$ 44.5 | 22.3 $\pm$ 8.8  | 46.8 $\pm$ 23.2 | 11.7 $\pm$ 5.59 |
| Orthophosphate (mg/L P)       | 0.16 $\pm$ 0.01                             | 0.04 $\pm$ 0.01 | 0.12 $\pm$ 0.04 | 0.16 $\pm$ 0.05 | 0.20 $\pm$ 0.02 | 0.02 $\pm$ 0.01 | 0.14 $\pm$ 0.05 | 0.94 $\pm$ 0.28 | 0.15 $\pm$ 0.01 | 0.55 $\pm$ 0.30 |
| Total Phosphorus (mg/L P)     | 0.73 $\pm$ 0.06                             | 0.34 $\pm$ 0.02 | 0.60 $\pm$ 0.04 | 0.72 $\pm$ 0.14 | 0.85 $\pm$ 0.16 | 0.29 $\pm$ 0.04 | 0.65 $\pm$ 0.08 | 3.13 $\pm$ 0.86 | 0.69 $\pm$ 0.04 | 1.92 $\pm$ 0.92 |
| Nitrate (mg/L N)              | 0.42 $\pm$ 0.17                             | 0.4 $\pm$ 0.09  | 0.63 $\pm$ 0.18 | 0.67 $\pm$ 0.41 | 0.68 $\pm$ 0.13 | 0.7 $\pm$ 0.33  | 0.93 $\pm$ 0.08 | 1.04 $\pm$ 0.82 | 0.73 $\pm$ 0.04 | 0.30 $\pm$ 0.23 |
| Total Nitrogen (mg/L N)       | 2.02 $\pm$ 0.80                             | 1.42 $\pm$ 0.20 | 1.77 $\pm$ 0.62 | 1.98 $\pm$ 0.74 | 1.74 $\pm$ 0.38 | 1.72 $\pm$ 0.63 | 1.19 $\pm$ 0.25 | 1.32 $\pm$ 0.29 | 1.66 $\pm$ 0.04 | 1.44 $\pm$ 0.23 |
| Dissolved Lead ( $\mu$ g/L)   | 1.1 $\pm$ 0.8                               | 0*              | 2.4 $\pm$ 0.8   | 0*              | 11.9 $\pm$ 3.5  | 0*              | 35.4 $\pm$ 31.1 | 0.97 $\pm$ 0.44 | 3.9 $\pm$ 0.8   | 0.01 $\pm$ 0.03 |
| Total Lead ( $\mu$ g/L)       | 64.3 $\pm$ 52.2                             | ---             | 36.7 $\pm$ 50.7 | 0*              | 139 $\pm$ 64.9  | 0*              | 190 $\pm$ 98.6  | 1.2 $\pm$ 1.7   | 119 $\pm$ 79.1  | 1.8 $\pm$ 2.5   |
| Dissolved Copper ( $\mu$ g/L) | 8.8 $\pm$ 1.4                               | 7.96 $\pm$ 2.3  | 6.7 $\pm$ 2.3   | 11.4 $\pm$ 21.6 | 7.7 $\pm$ 2.9   | 8.5 $\pm$ 13.9  | 12.4 $\pm$ 2.9  | 15.9 $\pm$ 16.2 | 4.4 $\pm$ 0.7   | 11.6 $\pm$ 33.1 |
| Total Copper ( $\mu$ g/L)     | 18.5 $\pm$ 13.9                             | 5.7 $\pm$ 3.3   | 40.8 $\pm$ 7.7  | 14.9 $\pm$ 7.5  | 43.9 $\pm$ 18.2 | 9.1 $\pm$ 2.8   | 50.2 $\pm$ 29.5 | 17.9 $\pm$ 6.4  | 130 $\pm$ 113   | 31.2 $\pm$ 30.3 |
| Dissolved Zinc ( $\mu$ g/L)   | 195 $\pm$ 42.3                              | 20.0 $\pm$ 15.4 | 152 $\pm$ 15.6  | 12.0 $\pm$ 15.8 | 165 $\pm$ 55.5  | 2.9 $\pm$ 3.3   | 134 $\pm$ 30.9  | 8.2 $\pm$ 9.3   | 56.4 $\pm$ 3.7  | 7.3 $\pm$ 6.0   |
| Total Zinc ( $\mu$ g/L)       | 190 $\pm$ 82.1                              | ---             | 334 $\pm$ 90.7  | 18.0 $\pm$ 10.1 | 231 $\pm$ 122   | 28.3 $\pm$ 8.0  | 299 $\pm$ 144   | 24.9 $\pm$ 8.7  | 286 $\pm$ 132   | 10.8 $\pm$ 10.2 |

\* Under detection limit considered as zero. -- Missing values are due to technical issues with ICP-MS.

**Table S4.** Mean effluent concentration  $\pm$  standard deviation of water quality parameters - Phase III.

| Water Quality Parameter       | Phase III with Plants |                 |                 |                 |                 |                 | Phase II  |              |
|-------------------------------|-----------------------|-----------------|-----------------|-----------------|-----------------|-----------------|-----------|--------------|
|                               | Blend#1               |                 |                 | Biofilter433    |                 |                 | No Plants |              |
|                               | Sea Oats              | Frogfruit       | Muhly           | Sea Oats        | Frogfruit       | Muhly           | Blend#1   | Biofilter433 |
| TSS (mg/L)                    | 53 $\pm$ 76.6         | 77.3 $\pm$ 55.4 | 111 $\pm$ 41.1  | 53.2 $\pm$ 31.5 | 94.7 $\pm$ 72.6 | 99.8 $\pm$ 57.8 | 11.05     | 11.7         |
| Orthophosphate (mg/L P)       | 0.03 $\pm$ 0.01       | 0.03 $\pm$ 0.01 | 0.04 $\pm$ 0.01 | 0.76 $\pm$ 0.31 | 0.83 $\pm$ 0.36 | 0.85 $\pm$ 0.33 | 0.16      | 0.55         |
| Total Phosphorus (mg/L P)     | 0.30 $\pm$ 0.08       | 0.32 $\pm$ 0.16 | 0.35 $\pm$ 0.11 | 2.58 $\pm$ 0.91 | 2.82 $\pm$ 1.39 | 2.87 $\pm$ 1.05 | 0.72      | 1.92         |
| Nitrate (mg/L N)              | 0.31 $\pm$ 0.10       | 0.26 $\pm$ 0.11 | 0.39 $\pm$ 0.16 | 0.19 $\pm$ 0.16 | 0.25 $\pm$ 0.11 | 0.22 $\pm$ 0.13 | 0.67      | 0.30         |
| Total Nitrogen (mg/L N)       | 1.86 $\pm$ 0.33       | 1.51 $\pm$ 0.26 | 1.73 $\pm$ 0.24 | 1.62 $\pm$ 0.18 | 2.06 $\pm$ 0.17 | 1.80 $\pm$ 0.17 | 1.98      | 1.44         |
| Dissolved Lead ( $\mu$ g/L)   | 0.43 $\pm$ 1.08       | 0*              | 0.06 $\pm$ 0.19 | 0.31 $\pm$ 0.64 | 0*              | 0.45 $\pm$ 1.00 | 0*        | 0.01         |
| Total Lead ( $\mu$ g/L)       | 1.28 $\pm$ 2.07       | 2.33 $\pm$ 1.75 | 1.56 $\pm$ 0.88 | 1.40 $\pm$ 1.06 | 3.5 $\pm$ 3.05  | 3.29 $\pm$ 2.68 | 0*        | 1.8          |
| Dissolved Copper ( $\mu$ g/L) | 10.4 $\pm$ 3.47       | 6.29 $\pm$ 2.61 | 8.86 $\pm$ 5.74 | 13.2 $\pm$ 6.42 | 16.8 $\pm$ 15.3 | 11.2 $\pm$ 6.62 | 11.4      | 11.6         |
| Total Copper ( $\mu$ g/L)     | 12.0 $\pm$ 4.38       | 10.9 $\pm$ 3.62 | 10.2 $\pm$ 2.40 | 15.4 $\pm$ 5.92 | 21.2 $\pm$ 13.4 | 18.9 $\pm$ 6.67 | 14.9      | 31.2         |
| Dissolved Zinc ( $\mu$ g/L)   | 4.38 $\pm$ 2.21       | 5.32 $\pm$ 3.50 | 7.05 $\pm$ 5.05 | 8.20 $\pm$ 6.76 | 4.99 $\pm$ 5.15 | 5.16 $\pm$ 6.25 | 12.0      | 7.3          |
| Total Zinc ( $\mu$ g/L)       | 6.18 $\pm$ 7.67       | 10.9 $\pm$ 5.11 | 9.96 $\pm$ 6.46 | 9.36 $\pm$ 3.98 | 14.8 $\pm$ 11.7 | 14.9 $\pm$ 11.8 | 18.0      | 10.8         |

\* Under detection limit considered as zero.
